# Supplementary material for: A versatile large-scale and green process for synthesizing magnetic nanoparticles with tunable magnetic hyperthermia features
Source: Royal Society of Chemistry journal article supplement (doi:10.1039/c6ra09362k), 2016-01-01
Supplement: c6ra09362k1.pdf [file c6ra09362k1.pdf]

## Supporting information

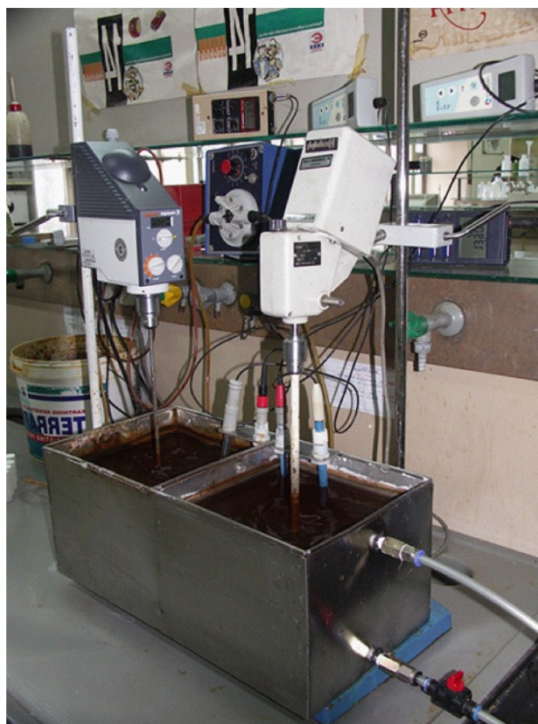

**Figure S1.** Continuous flow reactor for  $\text{Fe}_3\text{O}_4$  and ferrite nanoparticles production.

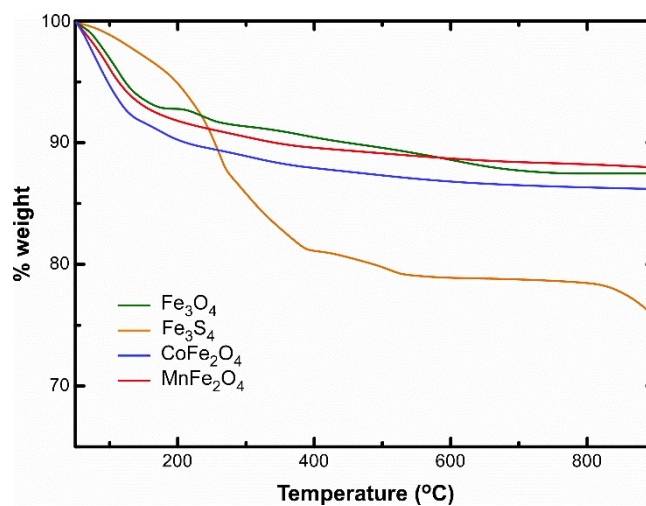

**Figure S2.** Thermogravimetric curves of uncoated nanoparticles.

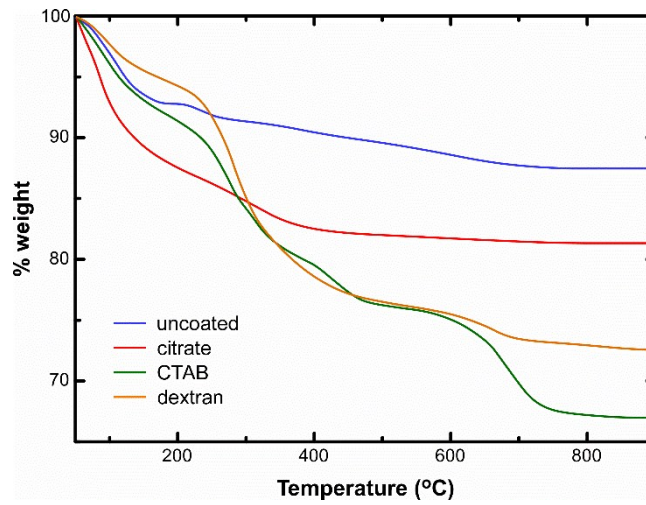

**Figure S3.** Thermogravimetric curves of uncoated and functionalized  $\text{Fe}_3\text{O}_4$  nanoparticles with citrate, CTAB and dextran.

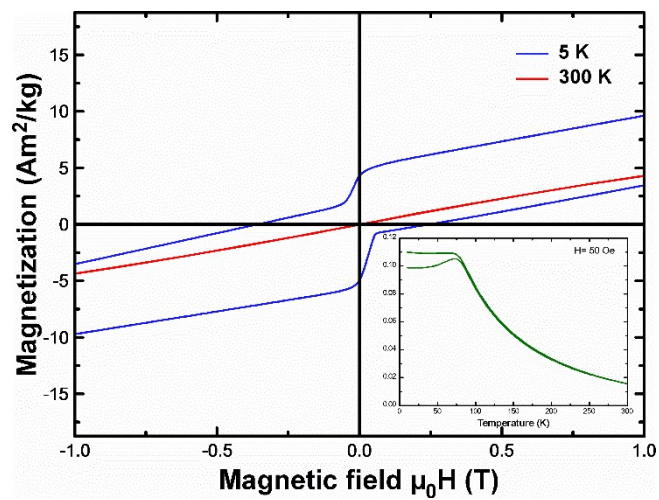

**Figure S4.** Magnetic hysteresis loops of citrate-coated  $\text{CoFe}_2\text{O}_4$  nanoparticles at 5 K and 300 K. The inset shows ZFC/FC curves in an external field of 50 Oe.

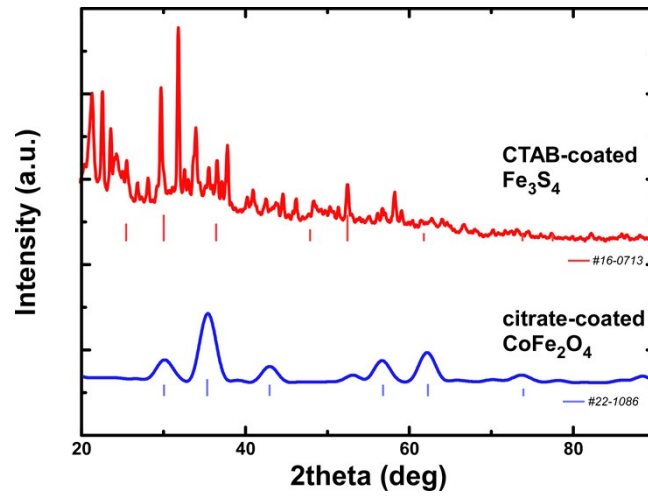

Figure S5. XRD diagram of citrate-CoFe<sub>2</sub>O<sub>4</sub> and CTAB-Fe<sub>3</sub>S<sub>4</sub> nanoparticles.

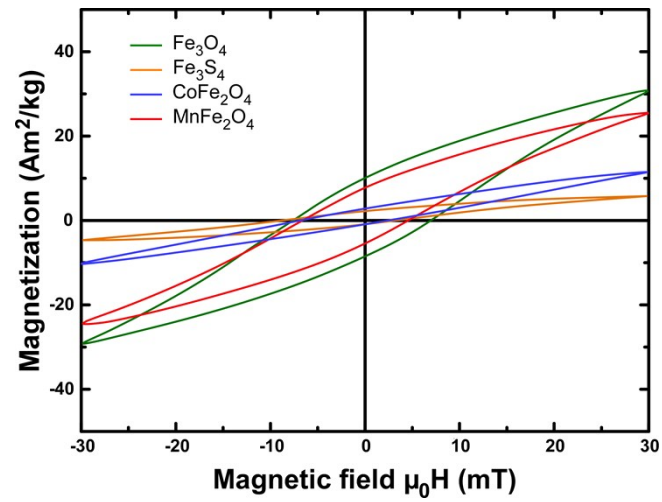

Figure S6. Minor loops at 30 mT of uncoated nanoparticles (data not normalized to metal content).

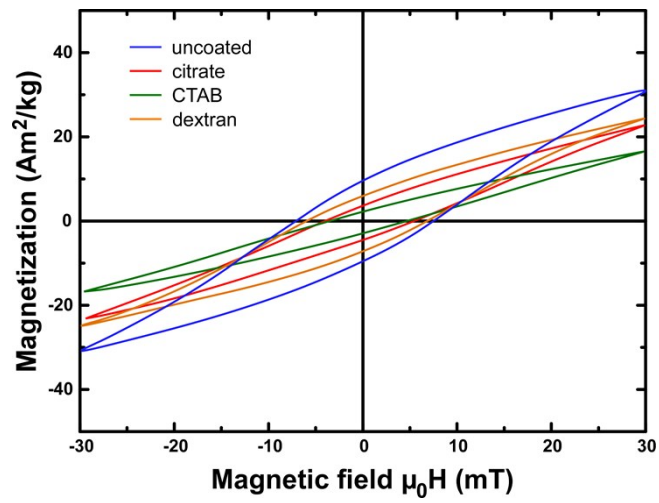

**Figure S7.** Minor loops at 30 mT of functionalized  $\text{Fe}_3\text{O}_4$  nanoparticles (data not normalized to metal content).

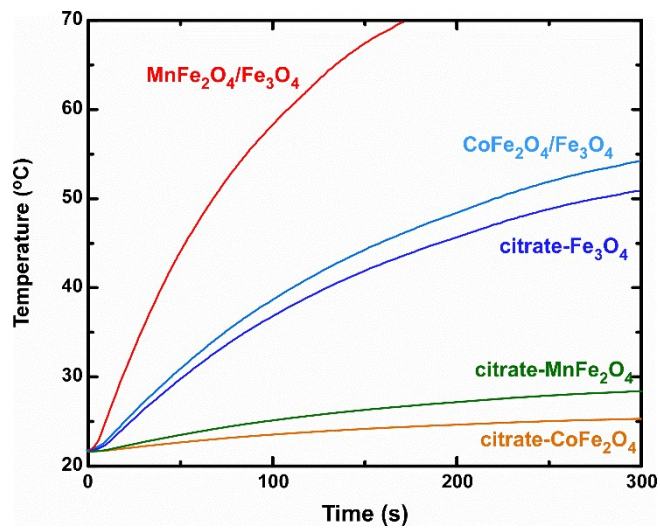

**Figure S8.** Magnetic hyperthermia heating curves of citrate-coated and binary nanoparticle systems at 30 mT and 765 kHz.

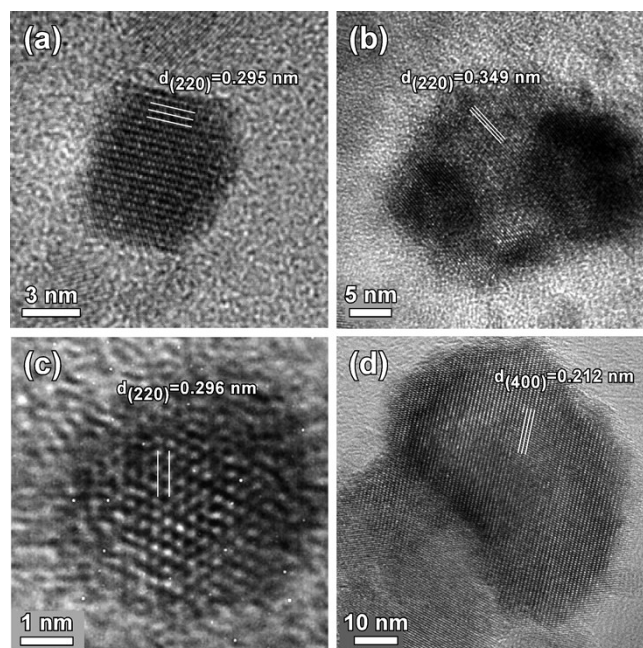

**Figure S9.** HRTEM images of citrate-coated  $\text{Fe}_3\text{O}_4$  (a),  $\text{Fe}_3\text{S}_4$  (b),  $\text{CoFe}_2\text{O}_4$  (c) and  $\text{MnFe}_2\text{O}_4$  (d) nanoparticles.
